# Supplementary material for: An effector from the Huanglongbing-associated pathogen targets citrus proteases
Source: PubMed Central journal article supplement (PMC5928222; doi:10.1038/s41467-018-04140-9), 2018-04-30
Supplement: 41467_2018_4140_MOESM1_ESM.pdf [file 41467_2018_4140_MOESM1_ESM.pdf]

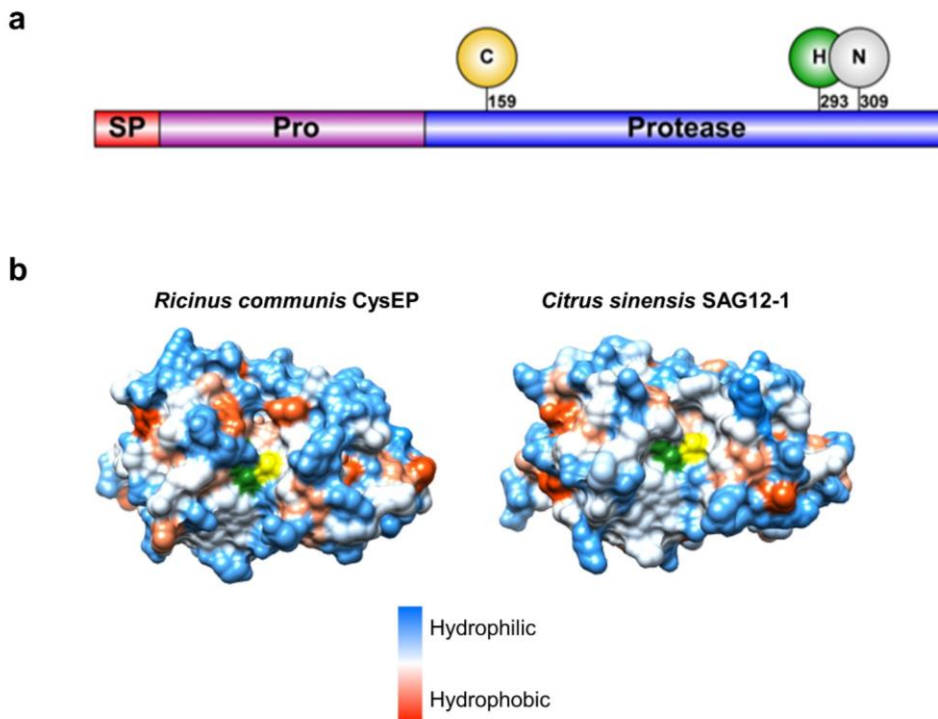

1

2 **Supplementary Figure 1. PLCP domain architecture and structural model of SAG12-1 from**  
 3 ***Citrus sinensis*.** **a**, Canonical PLCPs possess a signal peptide (SP), an autoinhibitory pro-  
 4 peptide, and the catalytic protease domain. The predicted catalytic triad of papain (cysteine159,  
 5 histidine293 and asparagine309) are presented as an example. **b**, A structural model for  
 6 CsSAG12-1. The predicted protease domain of CsSAG12-1 was submitted to MODELLER,  
 7 revealing 56% sequence similarity to the CysEP PLCP from *Ricinus communis* (PDB: 1S4V).  
 8 PDB 1S4V was used as a template for structural modeling of CsSAG12-1 and visualized in  
 9 CHIMERA.

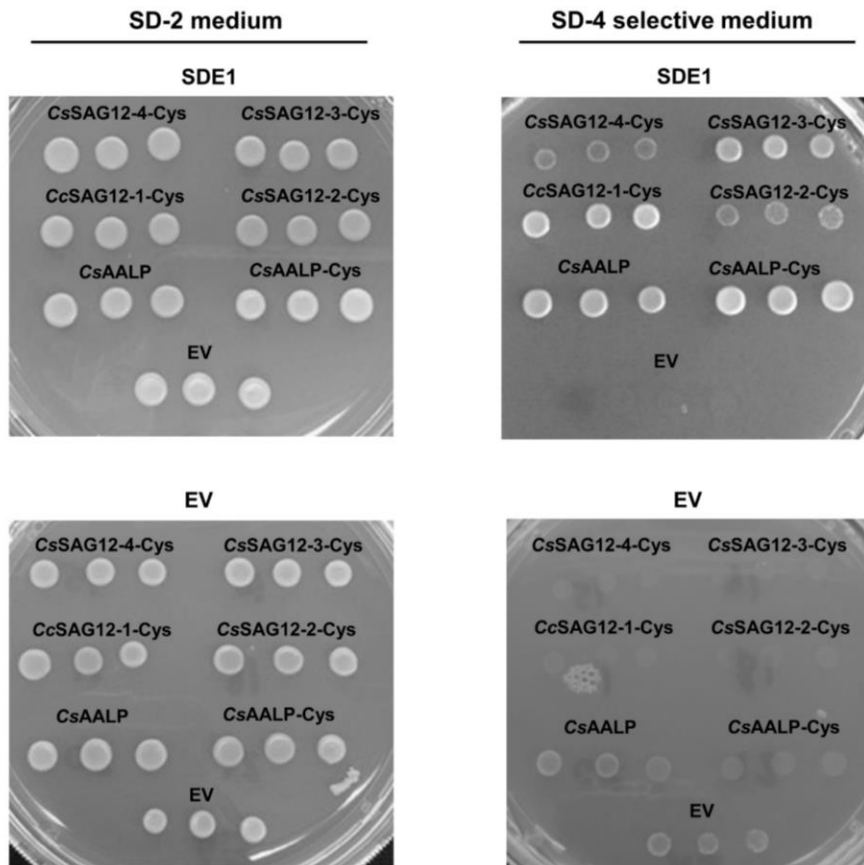

10

11 **Supplementary Figure 2. SDE1 interacts with additional PLCPs from the SAG12**  
 12 **subfamily.** Pairwise yeast-two-hybrid (Y2H) assay using SDE1 as bait and the cysteine protease  
 13 domains of PLCPs (CsSAG12-1, CsSAG12-3, CcSAG12-4) as the prey. Growth of yeast on SD-  
 14 4 selective medium represents protein-protein interaction, growth of yeast on SD-2 medium  
 15 confirms yeast transformation. Yeast cells transformed with pGBKT7 and pGADT7 empty vectors  
 16 severed as negative controls. CsAALP (full-length) and CsAALP-Cys (cysteine protease domain  
 17 only) served as positive controls.

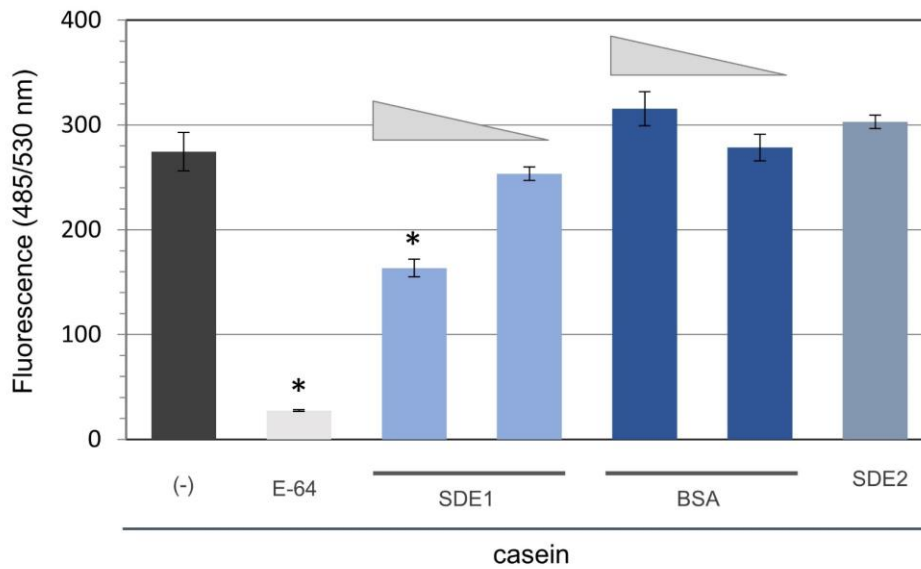

18

19 **Supplementary Figure 3. SDE1 but not SDE2 can inhibit the protease activity of papain.**

20 Proteolytic activity of papain measured by digestion of fluorescent casein substrates in the  
 21 presence of 1 μM E-64, purified SDE1 (0.74 and 0.15 μM) or SDE2 (0.3 μM) protein  
 22 (CLIBASIA\_03230), and BSA (0.74 and 0.15 μM). Fluorescence was measured at 485 nm  
 23 excitation over 530 nm emission. Values are average of duplicates with the Standard Deviation  
 24 shown as the error bars. Statistical analysis was done using Student's two-tailed t-test and  
 25 significant differences ( $p < 0.05$ ) are labeled with asterisks (\*).

26

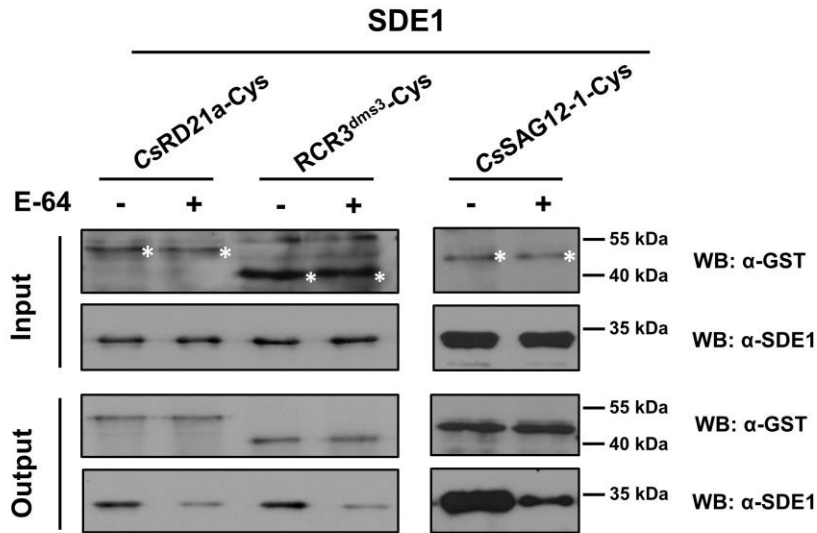

27  
28

29 **Supplementary Figure 4. E-64 inhibits the interaction of SDE1 with PLCPs *in vitro*.** Proteins  
30 extracted from *E. coli*-expressing GST-tagged cysteine protease domains of CsRD21a,  
31 CsSAG12-1 or RCR3<sup>dms3</sup> (from the wild potato species *Solanum demissum*) were pre-incubated  
32 with E-64. The enrichment of SDE1 on PLCP-bound resins was then examined by western  
33 blotting using an anti-SDE1 antibody. Asterisks (\*) indicate the protein bands corresponding to  
34 individual PLCPs.

35

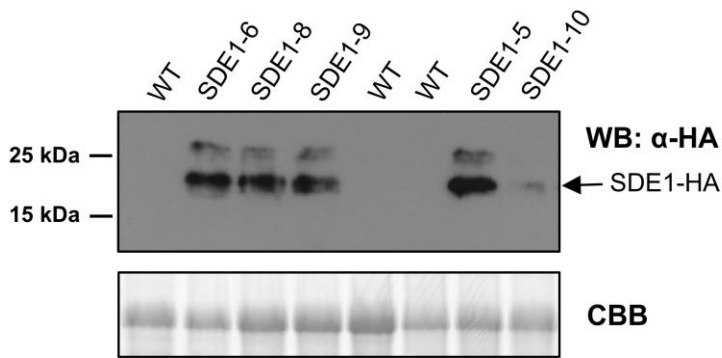

36

37 **Supplementary Figure 5. SDE1 proteins accumulate in transgenic citrus seedlings.** Leaves  
38 from individual transgenic citrus lines (one-year-old seedlings) were ground with liquid nitrogen  
39 into powder and re-suspended in 2x Laemmli loading dye. Samples were boiled for five minutes,  
40 then separated on a 12% protein gel for western blotting. SDE1 proteins were detected by anti-  
41 HA antibody (Santa Cruz Biotechnology, CA). Gel stained with Coomassie brilliant blue (CBB)  
42 served as a loading control. Leaf tissue from wild-type (WT) grapefruit seedlings of the same age  
43 were included as controls.

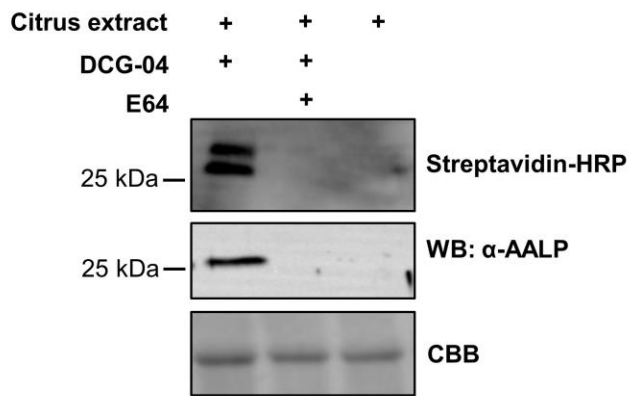

44

45 **Supplementary Figure 6. The anti-AALP antibody specifically recognizes citrus PLCPs.**

46 Two-hundred fifty micrograms of citrus leaf extract were incubated with and without E-64 for 30  
 47 min prior to the addition of DCG-04 for ABPP. Active PLCPs were captured by streptavidin IP  
 48 coupled with western blotting using streptavidin-HRP or anti-AALP antibodies. Coomassie brilliant  
 49 blue (CBB) stained gel served as a loading control.

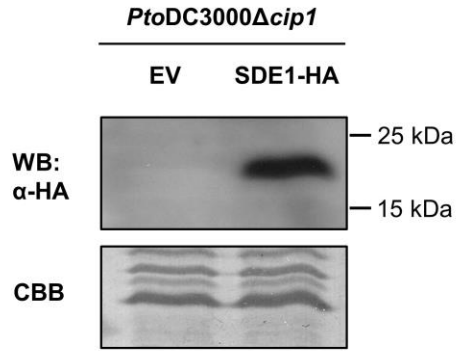

50

51 **Supplementary Figure 7. SDE1 is expressed and secreted by *Pseudomonas syringae* in an**  
52 **inducible medium.** *SDE1-HA* (full-length gene including sequences corresponding to the N-  
53 terminal secretion signal) was cloned in the plasmid vector pUCP20tk containing the promoter of  
54 *hopZ1a*. Empty vector and pUCP20tk::*SDE1* were introduced into *P. syringae* pv. tomato DC3000  
55  $\Delta cip1$  knockout mutant by electroporation. Transformants were grown in the M63 minimal medium  
56 (pH 5.3) to induce *SDE1* expression. The secretion of SDE1 proteins was detected in the  
57 supernatant of the cell culture using western blotting. Coomassie brilliant blue (CBB) stained gel  
58 served as a loading control.

59

60

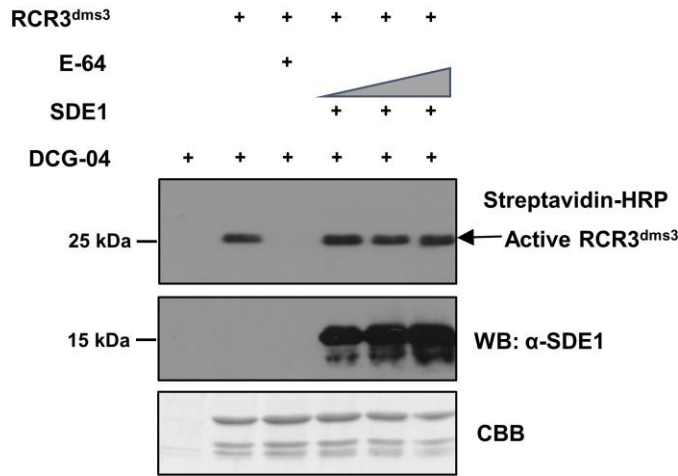

61  
62

63 **Supplementary Figure 8. SDE1 does not inhibit the activity of the wild potato RCR3<sup>dms3</sup>.**

64 Full-length of RCR3 from the wild potato species *Solanum demissum* (RCR3<sup>dms3</sup>) was transiently  
 65 expressed in *N. benthamiana* and secreted into the apoplast. Apoplastic fluid was extracted and  
 66 the active proteases were labeled using DCG-04 in the presence of 0.8, 1.6 or 3.2 μM of purified  
 67 SDE1 protein. Coomassie brilliant blue (CBB) served as a loading control.

68



a

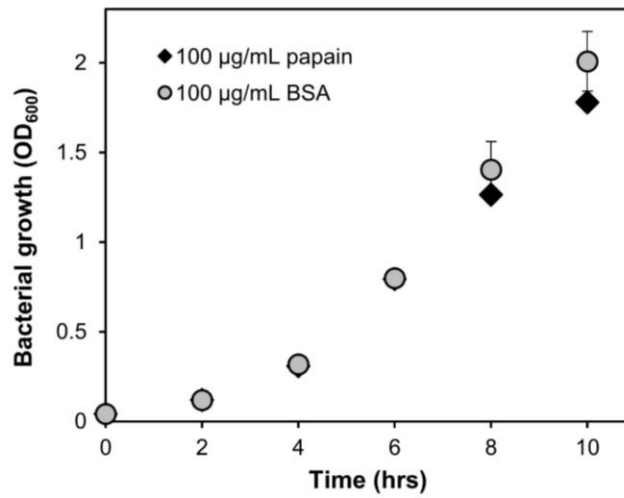

b

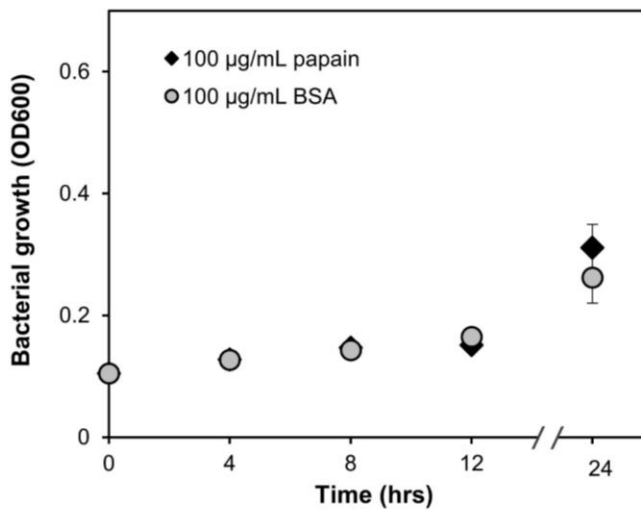

69

70 **Supplementary Figure 9. Supplementation of papain in culture media does not inhibit the**

71 **growth of *PtoDC3000Δcip1*.** *PtoDC3000Δcip1* containing pUCP20tk empty vector was grown in

72 **a**, King's B medium or **b**, hrp-inducing minimal medium in the presence of either 100 µg/mL papain

73 (black diamonds) or 100 µg/mL BSA (grey circles) and the optical density of the cultures (OD<sub>600</sub>)

74 was monitored over time. Graphs show mean ± standard deviation of three replicates. This

75 experiment was performed twice with similar results.

76

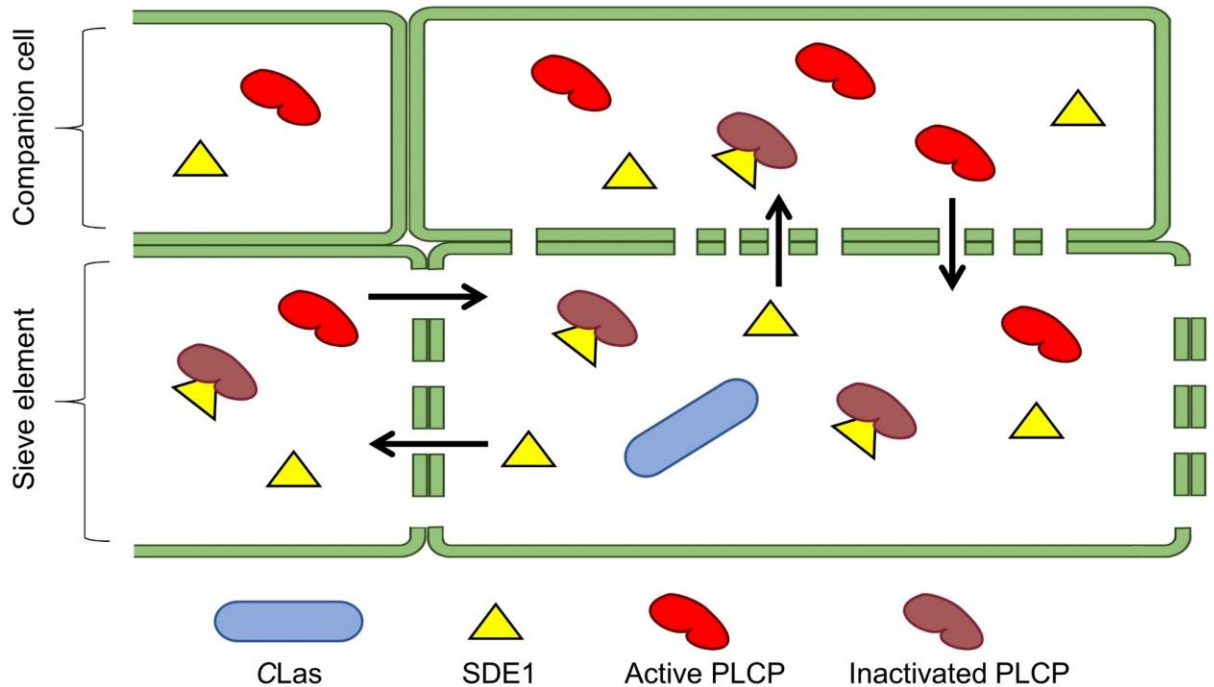

77

78 **Supplementary Figure 10. A potential model of SDE1 and PLCP interaction in CLas-**  
 79 **infected citrus.** After infection, CLas proliferates in phloem sieve elements. Sieve elements are  
 80 dependent upon adjacent, metabolically active companion cells. Citrus is able to perceive the  
 81 bacterial pathogen and induce defense responses, including increased PLCP accumulation.  
 82 These proteins may be directly delivered into the sieve elements through plasmodesmatal  
 83 connections. CLas possesses the Sec secretion system and secretes multiple Sec-delivered  
 84 effectors, including SDE1, which acts to inhibit the protease activity of PLCPs. SDE1 can move  
 85 through the sieve elements and may be able to translocate into adjacent companion cells to  
 86 suppress this PLCP-based defense responses and promote bacterial infection.

87

Figure 1d

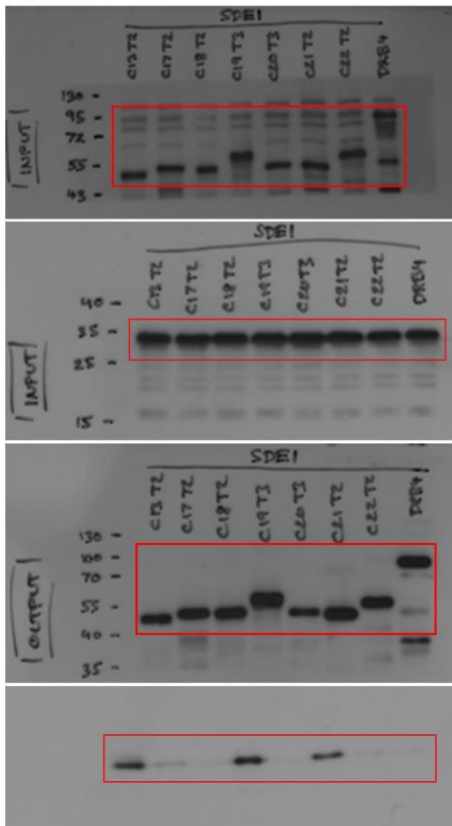

Figure 2d

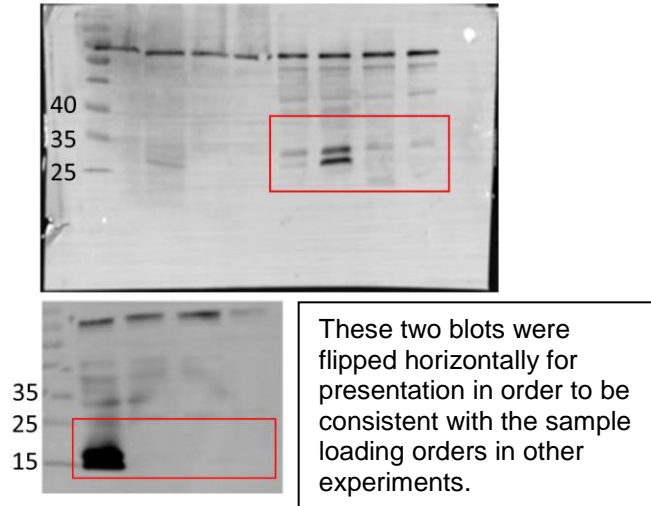

Figure 2e

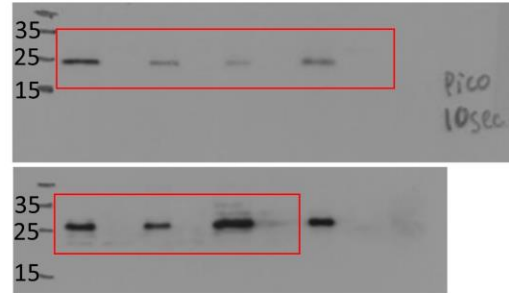

Figure 2b

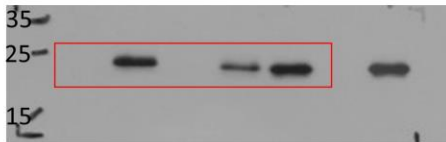

Figure 2c

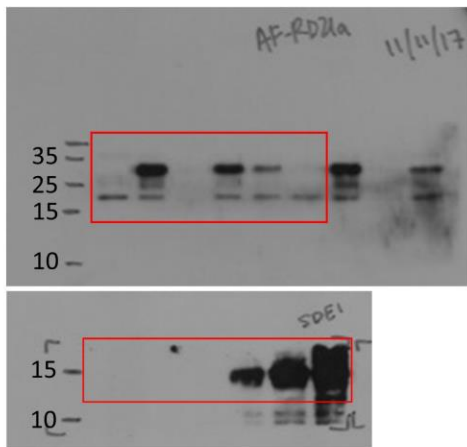

Figure 6b

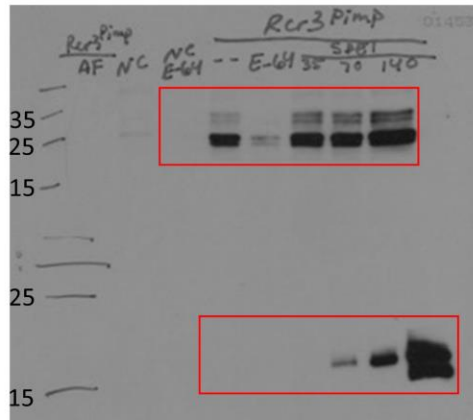

88

89 **Supplementary Figure 11. Un-cropped raw western blotting data presented in the main**  
90 **figures.**

91 **Supplementary Table 1.** Candidates identified from yeast-two-hybrid screening using SDE1 as  
92 the bait. Only “xylem cysteine proteinase 1” was confirmed using pairwise Y2H assay.

| <b>SDE1-interacting candidate</b>                | <b>NCBI Sequence ID</b> | <b>Pairwise Y2H Positive</b> |
|--------------------------------------------------|-------------------------|------------------------------|
| Diacylglycerol (DAG) protein, chloroplastic      | XM_006475194            | No                           |
| E3 ubiquitin–protein ligase RNF12–B              | XM_006489385            | No                           |
| Putative E3 ubiquitin–protein ligase XBAT31      | XM_006488247            | No                           |
| Heavy–metal–associated domain–containing protein | XM_006467144            | No                           |
| Calcyclin–binding protein                        | XM_006467400            | No                           |
| Xylem cysteine proteinase 1                      | XM_006493578            | Yes                          |

93

94 **Supplementary Table 2.** Analysis of published transcriptome data showing differentially  
 95 expressed *PLCPs* in *CLas*-infected *C. sinensis*.

| Gene ID in <i>C. sinensis</i>          | PLCP subfamily classification | Log <sub>2</sub> FC <sup>1</sup> | FDR <sup>2</sup> | Source                                  |
|----------------------------------------|-------------------------------|----------------------------------|------------------|-----------------------------------------|
| orange1.1g018568m                      | CTB                           | -1.93764                         | N/A              | Martinelli et. al. (2012)<br>RNA-seq    |
| orange1.1g047264m                      | XCP1                          | -1.07107                         | N/A              | Martinelli et. al. (2012)<br>RNA-seq    |
| orange1.1g017419m                      | RD21a                         | 1.1742                           | N/A              | Martinelli et. al. (2012)<br>RNA-seq    |
| orange1.1g012960m                      | XBCP3                         | 1.43348                          | N/A              | Martinelli et. al. (2012)<br>RNA-seq    |
| orange1.1g036910m                      | AALP                          | 1.54139                          | N/A              | Martinelli et. al. (2012)<br>RNA-seq    |
| orange1.1g024783m                      | RD21a                         | 1.59572                          | N/A              | Martinelli et. al. (2012)<br>RNA-seq    |
| orange1.1g019063m                      | SAG12                         | 1.97224                          | N/A              | Martinelli et. al. (2012)<br>RNA-seq    |
| orange1.1g019112m                      | SAG12                         | 2.6825                           | N/A              | Martinelli et. al. (2012)<br>RNA-seq    |
| orange1.1g018781m                      | XCP1                          | 0.822224                         | N/A              | Martinelli et. al. (2012)<br>RNA-seq    |
| orange1.1g017318m                      | RD19                          | 0.916496                         | N/A              | Martinelli et. al. (2012)<br>RNA-seq    |
| orange1.1g012960m                      | XCBP3                         | 0.812                            | 3.08E-15         | Kim, J.-S. et. al. (2009)<br>Microarray |
| orange1.1g017419m                      | RD21a                         | 0.815                            | 0.0438           | Kim, J.-S. et. al. (2009)<br>Microarray |
| orange1.1g018104m                      | CEP1                          | 1.384                            | 1.82E-06         | Kim, J.-S. et. al. (2009)<br>Microarray |
| orange1.1g018958m<br>orange1.1g018968m | SAG12                         | 3.192                            | 3.08E-15         | Kim, J.-S. et. al. (2009)<br>Microarray |

96

97 <sup>1</sup> Log<sub>2</sub> fold-change

98 <sup>2</sup> False discovery rate

99 Martinelli, F. *et al.* Transcriptome Profiling of Citrus Fruit Response to Huanglongbing Disease.  
 100 *PLos One* **7**, e38039 (2012).

101 Kim, J.-S. *et al.* Response of sweet orange (*Citrus sinensis*) to 'Candidatus Liberibacter  
 102 asiaticus' infection: microscopy and microarray analyses. *Phytopathology* **99**, 50-57 (2009).
