# Supplementary material for: An effector from the Huanglongbing-associated pathogen targets citrus proteases
Source: PubMed Central journal article supplement (PMC5928222; doi:10.1038/s41467-018-04140-9), 2018-04-30
Supplement: 41467_2018_4140_MOESM2_ESM.pdf [file 41467_2018_4140_MOESM2_ESM.pdf]

## **Descriptions of Additional Supplementary Files**

Supplementary Data 1: Primers used in this study.

Supplementary Data 2: PLCP peptides identified by Mass Spectrometry in Figure 4.
